# Supplementary material
Source: PubMed Central journal article supplement (PMC3127538)
Supplement: supp_mol.110.070458_MOL70458_Supplemental_Data.pdf [file supp_mol.110.070458_MOL70458_Supplemental_Data.pdf]

## **Supplementary Data**

Diacylglycerol lipase- $\alpha$  and - $\beta$  control neurite outgrowth in Neuro-2a cells through distinct molecular mechanisms. Jung, K.-M, Astarita, G., Thongkham, D. and Piomelli, D. Molecular Pharmacology.

Supplementary Table 1

Supplementary Figure S1

Supplementary Figure S2

Supplementary Figure Legends

Supplementary Table I. MAG (R=glycerol) and FA (R=OH) levels (pmol/mg protein) in Neuro-2a cells following DGL- $\beta$  overexpression (n=4).

| Acyl Chain                      | Structure                                                                           | Lipid | m/z | Vector        | DGL- $\beta$    |
|---------------------------------|-------------------------------------------------------------------------------------|-------|-----|---------------|-----------------|
| 16:0                            | 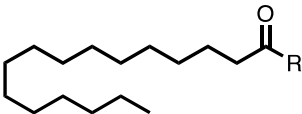   | MAG   | 353 | 278 $\pm$ 8   | 278 $\pm$ 10    |
|                                 |                                                                                     | FA    | 255 | 293 $\pm$ 7   | 309 $\pm$ 7     |
| 18:0                            |    | MAG   | 381 | 51 $\pm$ 9    | 41 $\pm$ 2      |
|                                 |                                                                                     | FA    | 283 | 414 $\pm$ 19  | 448 $\pm$ 27    |
| 18:1 $\Delta^9$                 |    | MAG   | 379 | 206 $\pm$ 18  | 259 $\pm$ 11    |
|                                 |                                                                                     | FA    | 281 | 158 $\pm$ 1   | 181 $\pm$ 5**   |
| 18:2 $\Delta^{9,12}$            |   | MAG   | 377 | 29 $\pm$ 3    | 50 $\pm$ 4*     |
|                                 |                                                                                     | FA    | 279 | 10 $\pm$ 1    | 11 $\pm$ 0.6    |
| 18:3 $\Delta^{9,12,15}$         |  | MAG   | 375 | 9 $\pm$ 2     | 21 $\pm$ 7      |
|                                 |                                                                                     | FA    | 277 | 0.8 $\pm$ 0.1 | 0.5 $\pm$ 0.1   |
| 20:3 $\Delta^{8,11,14}$         |  | MAG   | 403 | 59 $\pm$ 7    | 95 $\pm$ 4**    |
|                                 |                                                                                     | FA    | 305 | 3.5 $\pm$ 0.1 | 4.0 $\pm$ 0.1*  |
| 20:4 $\Delta^{5,8,11,14}$       |  | MAG   | 401 | 322 $\pm$ 23  | 782 $\pm$ 49*** |
|                                 |                                                                                     | FA    | 303 | 11 $\pm$ 0.5  | 15 $\pm$ 0.6**  |
| 20:5 $\Delta^{5,8,11,14,17}$    |  | MAG   | 399 | 12 $\pm$ 1    | 22 $\pm$ 5      |
|                                 |                                                                                     | FA    | 301 | 3.7 $\pm$ 0.4 | 4.8 $\pm$ 0.6   |
| 22:6 $\Delta^{4,7,10,13,16,19}$ |  | MAG   | 425 | 9.6 $\pm$ 0.5 | 20 $\pm$ 1***   |
|                                 |                                                                                     | FA    | 327 | 0.5 $\pm$ 0.0 | 0.4 $\pm$ 0.1   |

Values are means  $\pm$  SEM, n=3-4. \*\*\* $P$ <0.001, \*\* $P$ <0.01, \* $P$ <0.05 by two-tailed Student's  $t$ -test.

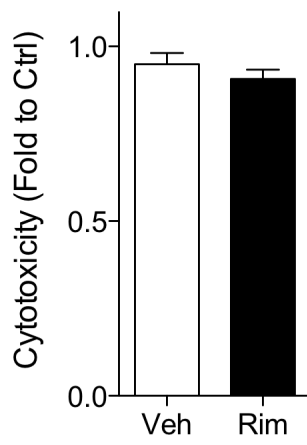

**Supplementary Fig. S1**

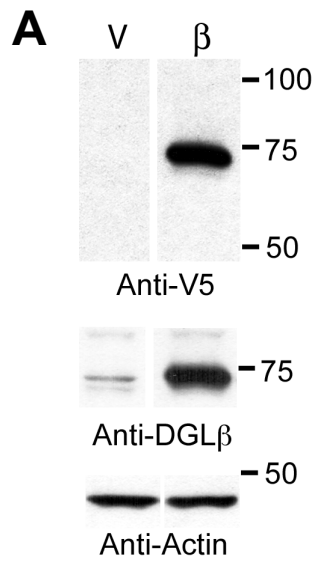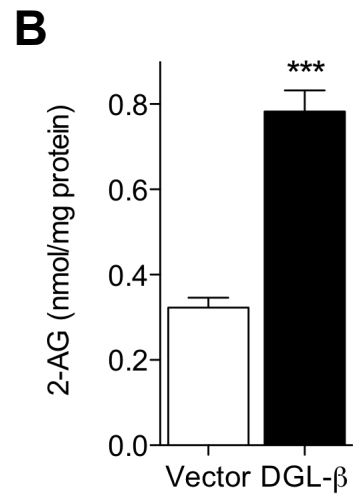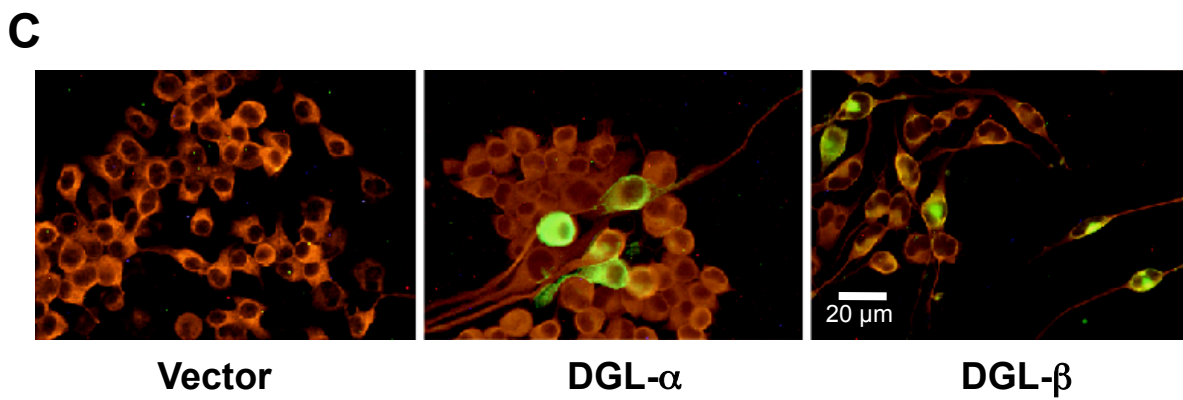

**Supplementary Fig. S2**

### Legends for Supplementary Figure

Supplementary Figure S1. Exposure to rimonabant does not cause cytotoxicity in Neuro-2a cells. Neuro-2a cells were pre-treated with either vehicle (DMSO, Veh) or rimonabant (1  $\mu$ M, Rim) for 10 min and then added with 20  $\mu$ M RA for 24 hours at 37°C. Levels of lactate dehydrogenase (LDH) released into the cultured media were measured using cytotoxicity detection kit, LDH (Roche, Indianapolis, IN) and the values were normalized by no treatment control (n=8).

Supplementary Figure S2. Overexpression of DGL isoforms induces morphological changes of Neuro-2a cells. (A) Neuro-2a cells were transfected with control pEF6 vector (V) or DGL- $\beta$ -V5-pEF6 ( $\beta$ ). Cells were harvested 72 hours after transfection and the expression of DGL- $\beta$ -V5 protein was assessed by western blot analyses using anti-V5 (top) or anti-DGL- $\beta$  (middle) antibody (Jung *et al.*, 2007). Both antibodies recognized a band of approximately 70 kDa, which was highly expressed in DGL- $\beta$  transfected cells. Actin (bottom) serves as a loading control. (B) The levels of 2-AG were determined under the same condition by a LC-MS method (n=4). (C) Neuro-2a cells were transfected with control pEF6 (Vector), DGL- $\alpha$ -V5-pEF6 (DGL- $\alpha$ ) or DGL- $\beta$ -V5-pEF6 (DGL- $\beta$ ). After 72 hours of transfection, cells were fixed and double-immunostained with a rabbit polyclonal anti-V5 (for DGL staining, green) and a mouse monoclonal anti- $\beta$ -Tubulin (for  $\beta$ -Tubulin staining, red). Representative fluorescence microscope images were shown. \*\*\* $P$ <0.001 by two-tailed  $t$ -test.
